# Supplementary material
Source: Research Square preprint supplement (doi:10.21203/rs.3.rs-8209611/v1)
Supplement: Supplementary file 2 [file d19b3fe2921fc68f7c3f6ba9.docx]

| **Biodiversity level** | **Crops** | **Abbreviation and number of treatment** |
| --- | --- | --- |
| Single crop | Maize, hemp, faba bean (separate crops) | M (1), H (2), FB (3) |
| Binary crop | Maize + hemp | M + H (4) |
| Maize + faba bean | M + FB (5) |
| Hemp + faba bean | H + FB (6) |
| Ternary crop | Maize + hemp + faba bean | M + H + FB (7) |

**Table 1.** Experimental treatments and their abbreviations.

| **Crop diversification**  **(factor A)** | **Vegetation conditions of the vegetative season (factor B)** | | | **Average A** |
| --- | --- | --- | --- | --- |
| 2020 | 2021 | 2022 |
| **Maize** | | | | |
| **M** | 246.8 | 183.3 | 112.5 | **180.8a** |
| **M**+H | 205.7 | 170.3 | 104.1 | **160.0b** |
| **M**+FB | 210.7 | 191.9 | 124.1 | **175.6a** |
| **M**+H+FB | 194.7 | 170.7 | 108.6 | **158.0b** |
| ***Average B*** | **214.5A** | **179.1B** | **112.3C** |  |
| ***Interaction A x B***, *F-akt. 2.8, P ≤ 0.05 > 0.01, R05 – 21.75, R01 – 29.56.* | | | | |

| **Technical hemp** | | | | |
| --- | --- | --- | --- | --- |
| **H** | 233.1 | 193.6 | 133.5 | **186.7a** |
| M+**H** | 204.5 | 156.6 | 111.4 | **157.5bc** |
| **H**+FB | 217.5 | 184.0 | 153.5 | **185.0ab** |
| M+**H**+FB | 175.2 | 145.9 | 122.9 | **148.0c** |
| ***Average B*** | **207.6A** | **170.0B** | **130.4C** |  |
| ***Interaction A x B***, *F-akt. 0.51, P > 0.05, R05 – 48.96, R01 – 66.55.* | | | | |
| **Faba bean** | | | | |
| **FB** | 95.9 | 75.1 | 99.3 | **90.1b** |
| M+**FB** | 111.2 | 89.1 | 102.8 | **101.0a** |
| H+**FB** | 103.9 | 76.5 | 111.1 | **97.1ab** |
| M+H+**FB** | 104.7 | 70.3 | 105.8 | **93.6ab** |
| ***Average B*** | **103.9A** | **77.7B** | **104.7A** |  |
| ***Interaction A x B***, *F-akt. 0.86, P > 0.05, R05 – 17.7, R01 – 24.06.* | | | | |

Note: M – maize single crop, H – hemp single crop, FB – faba bean single crop, M+H – binary maize and hemp crop, M+FB – binary maize and faba bean crop, H+FB – binary hemp and faba bean crop, M+H+FB – ternary maize, hemp and faba bean crop. Different lower case letters indicate significant differences between crop diversification level at *P* ≤ 0.05 > 0.01. Different upper case letters indicate significant differences between experimental year conditions at *P* ≤ 0.05 > 0.01.

**Table 2.** Effects of crop diversification level and vegetation conditions of the research year on the crop height of maize, technical hemp, and faba bean (cm).

| **Crop diversification**  **(factor A)** | | **Vegetation conditions of the vegetative season (factor B)** | | | **Average A** |
| --- | --- | --- | --- | --- | --- |
| 2020 | 2021 | 2022 |
| **Maize** | | | | | |
| **M** | | 362.7 | 427.1 | 235.7 | **341.8a** |
| **M**+H | | 180.2 | 361.3 | 163.7 | **235.1b** |
| **M**+FB | | 231.0 | 445.9 | 156.2 | **277.7ab** |
| **M**+H+FB | | 156.3 | 411.2 | 133.1 | **233.5b** |
| ***Average B*** | | **232.5B** | **411.4A** | **172.2B** |  |
| ***Interaction A x B***, *F-akt. 0.53, P > 0.05, R05 – 181.09, R01 – 246.13.* | | | | | |
| **Technical hemp** | | | | | |
| **H** | 95.7 | | 218.4 | 135.2 | **149.8a** |
| M+**H** | 59.4 | | 101.6 | 81.2 | **80.7b** |
| **H**+FB | 64.6 | | 187.1 | 113.0 | **121.5ab** |
| M+**H**+FB | 73.2 | | 219.8 | 108.2 | **133.7a** |
| ***Average B*** | **73.2B** | | **181.7A** | **109.4B** |  |
| ***Interaction A x B***, *F-akt. 0.9, P > 0.05, R05 – 76.43, R01 – 103.88.* | | | | | |
| **Faba bean** | | | | | |
| **FB** | 141.9 | | 213.6 | 288.1 | **214.5a** |
| M+**FB** | 83.8 | | 225.9 | 371.8 | **227.2a** |
| H+**FB** | 67.7 | | 334.4 | 229.6 | **210.6a** |
| M+H+**FB** | 78.6 | | 148.4 | 239.7 | **155.5a** |
| ***Average B*** | **93.0B** | | **230.6A** | **282.3A** |  |
| ***Interaction A x B***, *F-akt. 2.0, P > 0.05, R05 – 133.05, R01 – 180.84.* | | | | | |

Note: M – maize single crop, H – hemp single crop, FB – faba bean single crop, M+H – binary maize and hemp crop, M+FB – binary maize and faba bean crop, H+FB – binary hemp and faba bean crop, M+H+FB – ternary maize, hemp and faba bean crop. Different lower case letters indicate significant differences between crop diversification level at *P* ≤ 0.05 > 0.01. Different upper case letters indicate significant differences between experimental year conditions at *P* ≤ 0.05 > 0.01.

**Table 3.** Effects of crop diversification level and vegetation conditions of the research year on the leaf assimilation area of maize, technical hemp, and faba bean (cm2).

| **Crop diversification**  **(factor A)** | | **Vegetation conditions of the vegetative season (factor B)** | | | **Average A** |
| --- | --- | --- | --- | --- | --- |
| 2020 | 2021 | 2022 |
| **Maize** | | | | | |
| **M** | | 39.7 | 27.8 | 7.4 | **25.0a** |
| **M**+H | | 24.2 | 23.8 | 7.6 | **18.6b** |
| **M**+FB | | 28.8 | 36.4 | 9.9 | **25.0a** |
| **M**+H+FB | | 25.9 | 27.1 | 9.9 | **20.9ab** |
| ***Average B*** | | **29.7A** | **28.8A** | **8.7B** |  |
| ***Interaction A x B***, *F-akt. 4.29, P ≤ 0.010 > 0.001, R05 – 6.99, R01 – 9.5.* | | | | | |
| **Technical hemp** | | | | | |
| **H** | 23.1 | | 30.2 | 16.7 | **23.4a** |
| M+**H** | 20.4 | | 27.2 | 17.4 | **21.7a** |
| **H**+FB | 22.4 | | 32.9 | 17.2 | **24.2a** |
| M+**H**+FB | 24.2 | | 24.5 | 14.8 | **21.2a** |
| ***Average B*** | **22.5B** | | **28.7A** | **16.5C** |  |
| ***Interaction A x B***, *F-akt. 0.9, P > 0.05, R05 – 7.3, R01 – 9.92.* | | | | | |
| **Faba bean** | | | | | |
| **FB** | 27.5 | | 25.2 | 54.4 | **35.7a** |
| M+**FB** | 22.7 | | 20.9 | 39.8 | **27.8b** |
| H+**FB** | 20.2 | | 21.0 | 41.0 | **27.4b** |
| M+H+**FB** | 25.6 | | 22.8 | 47.9 | **32.1ab** |
| ***Average B*** | **24.0B** | | **22.5B** | **45.8A** |  |
| ***Interaction A x B***, *F-akt. 0.86, P > 0.05, R05 – 8.31, R01 – 11.3.* | | | | | |

Note: M – maize single crop, H – hemp single crop, FB – faba bean single crop, M+H – binary maize and hemp crop, M+FB – binary maize and faba bean crop, H+FB – binary hemp and faba bean crop, M+H+FB – ternary maize, hemp and faba bean crop. Different lower case letters indicate significant differences between crop diversification level at *P* ≤ 0.05 > 0.01. Different upper case letters indicate significant differences between experimental year conditions at *P* ≤ 0.05 > 0.01.

**Table 4.** Effects of crop diversification level and vegetation conditions of the research year on the leaf chlorophyll index of maize, technical hemp, and faba bean.

| **Crop diversification**  **(factor A)** | **Vegetation conditions of the vegetative season (factor B)** | | | **Average A** |
| --- | --- | --- | --- | --- |
| 2020 | 2021 | 2022 |
| **Maize** | | | | |
| **M** | 133.6 | 153.6 | 115.8 | **134.3a** |
| **M**+H | 70.7 | 55.7 | 82.9 | **69.8c** |
| **M**+FB | 70.9 | 159.4 | 77.1 | **102.4b** |
| **M**+H+FB | 43.4 | 93.9 | 57.9 | **65.0c** |
| ***Average B*** | **79.6B** | **115.6A** | **83.4B** |  |
| ***Interaction A x B***, *F-akt. 2.31, P > 0.05, R05 – 50.99, R01 – 69.31.* | | | | |

| **Technical hemp** | | | | |
| --- | --- | --- | --- | --- |
| **H** | 26.7 | 104.9 | 58.3 | **63.3a** |
| M+**H** | 20.5 | 94.9 | 35.4 | **50.3a** |
| **H**+FB | 22.7 | 89.8 | 58.3 | **57.0a** |
| M+**H**+FB | 15.9 | 96.0 | 48.0 | **53.3a** |
| ***Average B*** | **21.4C** | **96.4A** | **50.0B** |  |
| ***Interaction A x B***, *F-akt. 0.67, P > 0.05, R05 – 23.19, R01 – 31.52.* | | | | |

| **Faba bean** | | | | |
| --- | --- | --- | --- | --- |
| **FB** | 59.0 | 135.6 | 146.7 | **113.7a** |
| M+**FB** | 45.8 | 130.5 | 143.8 | **106.7a** |
| H+**FB** | 31.8 | 131.1 | 121.7 | **94.8a** |
| M+H+**FB** | 39.6 | 113.6 | 147.9 | **100.4a** |
| ***Average B*** | **44.0B** | **127.7A** | **140.0A** |  |
| ***Interaction A x B***, *F-akt. 0.62, P > 0.05, R05 – 35.1, R01 – 47.71.* | | | | |

Note: M – maize single crop, H – hemp single crop, FB – faba bean single crop, M+H – binary maize and hemp crop, M+FB – binary maize and faba bean crop, H+FB – binary hemp and faba bean crop, M+H+FB – ternary maize, hemp and faba bean crop. Different lower case letters indicate significant differences between crop diversification level at *P* ≤ 0.05 > 0.01. Different upper case letters indicate significant differences between experimental year conditions at *P* ≤ 0.05 > 0.01.

**Table 5.** Effects of crop diversification level and vegetation conditions of the research year on the average green biomass of maize, technical hemp, and faba bean in the middle of vegetation (g m-2).

| **Crop diversification**  **(factor A)** | | **Vegetation conditions of the vegetative season (factor B)** | | | | | | | | **Average A** |
| --- | --- | --- | --- | --- | --- | --- | --- | --- | --- | --- |
| 2020 | | | 2021 | | | 2022 | |
| **Maize** | | | | | | | | | | |
| **M** | | 7335.6 | | | 4163.3 | | | 1733.3 | | **4410.7a** |
| **M**+H | | 2450.0 | | | 1810.0 | | | 920.8 | | **1726.9c** |
| **M**+FB | | 4137.8 | | | 3483.3 | | | 1291.1 | | **2970.7b** |
| **M**+H+FB | | 1060.0 | | | 1540.6 | | | 357.8 | | **986.1d** |
| ***Average B*** | | **3745.8A** | | | **2749.3B** | | | **1075.8C** | |  |
| ***Interaction A x B***, *F-akt. 11.05, P ≤ 0.010 > 0.001, R05 – 989.94, R01 – 1345.51.* | | | | | | | | | | |
| **Technical hemp** | | | | | | | | | | |
| **H** | | | 3022.2 | | | 1791.1 | | 775.6 | | **1863.0a** |
| M+**H** | | | 1323.3 | | | 644.2 | | 260.0 | | **742.5b** |
| **H**+FB | | | 2204.4 | | | 1787.2 | | 596.1 | | **1529.3a** |
| M+**H**+FB | | | 1146.7 | | | 619.4 | | 281.7 | | **682.6b** |
| ***Average B*** | | | **1924.2A** | | | **1210.5B** | | **478.3C** | |  |
| ***Interaction A x B****, F-akt. 1.16, P > 0.05, R05 – 932.49, R01 – 1267.41.* | | | | | | | | | | |
| **Faba bean** | | | | | | | | | | |
| **FB** | 1128.9 | | | 822.2 | | | 448.9 | | **800.0a** | |
| M+**FB** | 693.1 | | | 333.3 | | | 336.7 | | **454.4b** | |
| H+**FB** | 420.0 | | | 315.6 | | | 323.3 | | **353.0b** | |
| M+H+**FB** | 684.4 | | | 288.9 | | | 365.6 | | **446.3b** | |
| ***Average B*** | **731.6A** | | | **440.0B** | | | **368.6B** | |  | |
| ***Interaction A x B***, *F-akt. 5.12, P ≤ 0.010 > 0.001, R05 – 18.45, R01 – 245.27.* | | | | | | | | | | |

Note: M – maize single crop, H – hemp single crop, FB – faba bean single crop, M+H – binary maize and hemp crop, M+FB – binary maize and faba bean crop, H+FB – binary hemp and faba bean crop, M+H+FB – ternary maize, hemp and faba bean crop. Different lower case letters indicate significant differences between crop diversification level at *P* ≤ 0.05 > 0.01. Different upper case letters indicate significant differences between experimental year conditions at *P* ≤ 0.05 > 0.01.

**Table 6.** Effects of crop diversification level and vegetation conditions of the research year on the average green biomass of maize, technical hemp, and faba bean at the end of vegetation (g m-2).

| **Crop diversification**  **(factor A)** | **Vegetation conditions of the research year (factor B)** | | | **Average A** |
| --- | --- | --- | --- | --- |
| 2020 | 2021 | 2022 |
| M | 7335.6 | 4148.9 | 1760.0 | **4410.7a** |
| H | 3022.2 | 1791.1 | 775.6 | **1863.0d** |
| FB | 1128.9 | 822.2 | 448.9 | **800.0e** |
| M+H | 3773.3 | 2454.2 | 1180.8 | **2469.4c** |
| M+FB | 4820.0 | 3816.7 | 1627.8 | **3421.5b** |
| H+FB | 2620.0 | 2086.1 | 917.2 | **1874.4d** |
| M+H+FB | 3563.3 | 2737.8 | 1370.6 | **2557.2c** |
| ***Average B*** | **3751.9A** | **2551.0B** | **1154.4C** |  |
| ***Interaction A x B***, *F-akt. 4.85, P ≤ 0.010 > 0.001, R05 – 1019.97, R01 – 1364.86.* | | | | |

Note: M – maize single crop, H – hemp single crop, FB – faba bean single crop, M+H – binary maize and hemp crop, M+FB – binary maize and faba bean crop, H+FB – binary hemp and faba bean crop, M+H+FB – ternary maize, hemp and faba bean crop. Different lower case letters indicate significant differences between crop diversification level at *P* ≤ 0.05 > 0.01. Different upper case letters indicate significant differences between experimental year conditions at *P* ≤ 0.05 > 0.01.

**Table 7**. Effects of crop diversification level and vegetation conditions of the research year on the average green biomass of crops (g m-2).

| **Crop diversification**  **(factor A)** | **Vegetation conditions of the research year (factor B)** | | | **Average A** |
| --- | --- | --- | --- | --- |
| 2020 | 2021 | 2022 |
| M | 446.1 | 184.8 | 88.7 | **239.9d** |
| H | 903.9 | 133.2 | 168.9 | **402.0d** |
| FB | 981.1 | 235.7 | 245.0 | **487.3cd** |
| M+H | 2470.2 | 240.4 | 158.2 | **956.2b** |
| M+FB | 1716.6 | 247.5 | 279.2 | **747.8bc** |
| H+FB | 2005.7 | 231.0 | 263.8 | **833.5b** |
| M+H+FB | 4401.6 | 412.9 | 789.7 | **1868.0a** |
| ***Average B*** | **1846.4A** | **240.8B** | **284.8B** |  |
| ***Interaction A x B***, *F-akt. 11.38, P ≤ 0.010 > 0.001, R05 – 584.52, R01 – 782.16.* | | | | |

Note: M – maize single crop, H – hemp single crop, FB – faba bean single crop, M+H – binary maize and hemp crop, M+FB – binary maize and faba bean crop, H+FB – binary hemp and faba bean crop, M+H+FB – ternary maize, hemp and faba bean crop. Different lower case letters indicate significant differences between crop diversification level at *P* ≤ 0.05 > 0.01. Different upper case letters indicate significant differences between experimental year conditions at *P* ≤ 0.05 > 0.01.

**Table 8.** Effects of crop diversification level and vegetation conditions of the research year on the average dried biomass of crops (g m-2).
